# Supplementary material
Source: Springer Nature journal article supplement (https://www.springermedizin.de/resource/supplementary/12969_2012_949_MOESM3_ESM.pdf/9588828)

**A**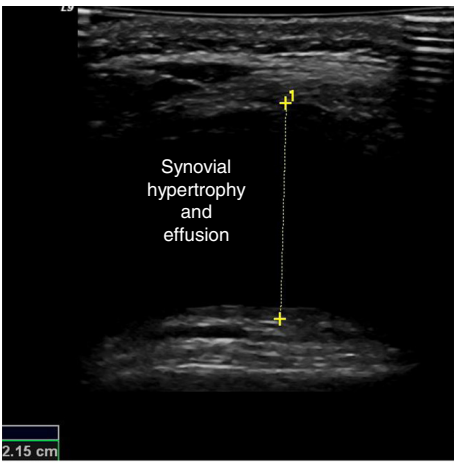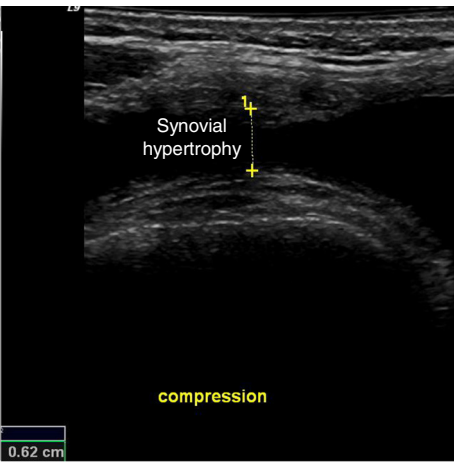**B**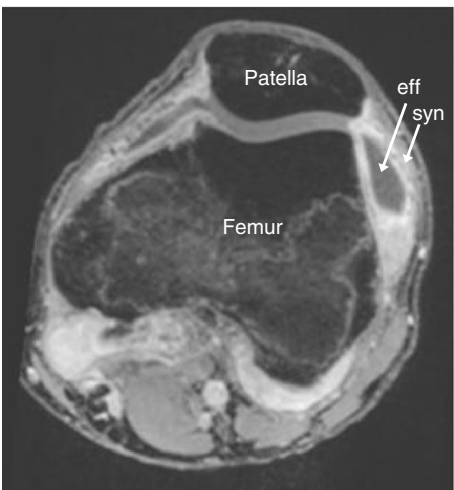

Supplement: MOESM3 [file 9588828]
